# Supplementary material for: A Qualitative Analysis of Cultured Adventitious Ginseng Root’s Chemical Composition and Immunomodulatory Effects
Source: MDPI journal article supplement (doi:10.3390/molecules29010111), 2023-12-23
Supplement: s1 [file s1]

Supplementary information

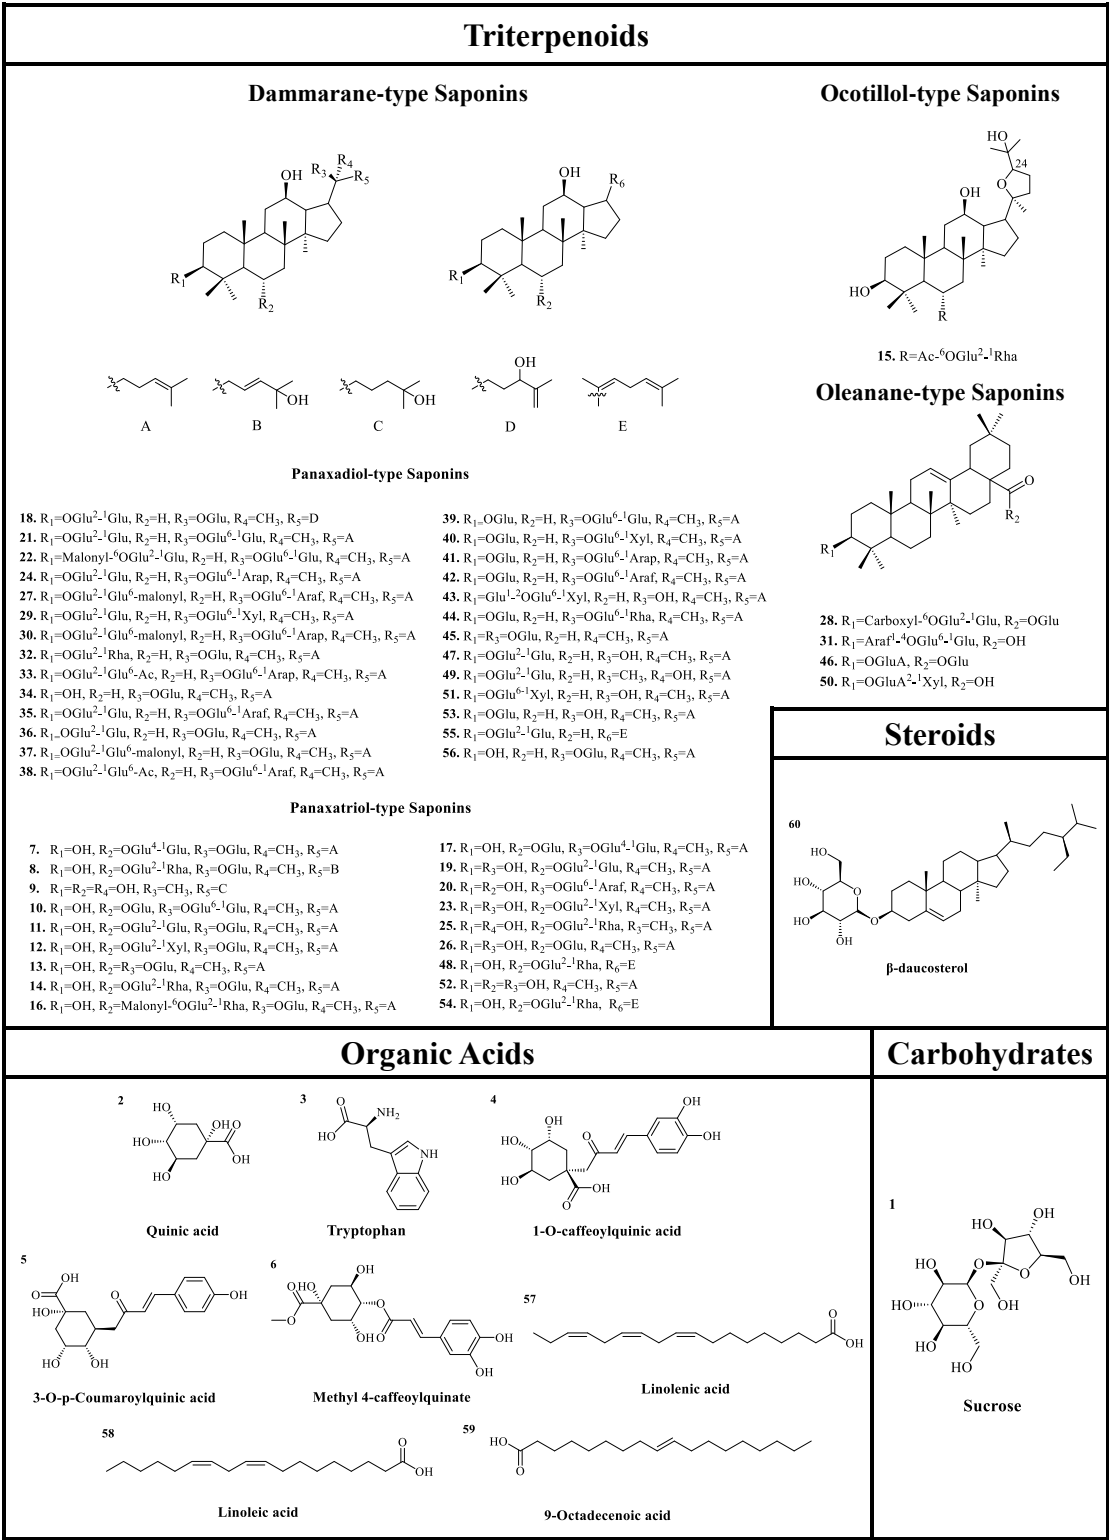

Figure S1 Chemical structures of compounds identified in cAR of ginseng extract.

Table S1 Body weights and organ / body weight ratio of mice in each group. Results are in average $\pm$ SD. Body weight is measured in gram.

|              | Body weight (week) |                  |                  |                  |                  | Organ / BW            |                       |
|--------------|--------------------|------------------|------------------|------------------|------------------|-----------------------|-----------------------|
|              | 0                  | 1                | 2                | 3                | 4                | Thymus/BW             | Spleen/BW             |
| Control      | 30.85 $\pm$ 1.67   | 38.25 $\pm$ 2.79 | 41.50 $\pm$ 3.27 | 44.29 $\pm$ 3.33 | 46.83 $\pm$ 3.65 | 0.00165 $\pm$ 0.00017 | 0.00287 $\pm$ 0.00047 |
| 21 mg/Kg BW  | 31.13 $\pm$ 1.74   | 38.11 $\pm$ 3.28 | 41.53 $\pm$ 3.84 | 43.87 $\pm$ 3.46 | 45.77 $\pm$ 3.79 | 0.00142 $\pm$ 0.00028 | 0.00245 $\pm$ 0.00028 |
| 42 mg/Kg BW  | 31.31 $\pm$ 1.40   | 37.40 $\pm$ 2.43 | 41.74 $\pm$ 2.86 | 43.89 $\pm$ 3.82 | 45.96 $\pm$ 4.02 | 0.00149 $\pm$ 0.00033 | 0.00266 $\pm$ 0.00043 |
| 83 mg/Kg BW  | 30.93 $\pm$ 1.61   | 38.32 $\pm$ 2.99 | 42.88 $\pm$ 3.44 | 44.62 $\pm$ 3.36 | 46.6 $\pm$ 3.69  | 0.00156 $\pm$ 0.00045 | 0.00285 $\pm$ 0.00067 |
| 125 mg/Kg BW | 30.79 $\pm$ 1.50   | 37.20 $\pm$ 2.47 | 41.02 $\pm$ 3.02 | 43.07 $\pm$ 3.32 | 45.37 $\pm$ 3.28 | 0.00143 $\pm$ 0.00024 | 0.00284 $\pm$ 0.00055 |
